# Supplementary material for: Does BPPV affect the psychological state of patients?
Source: Research Square preprint supplement (doi:10.21203/rs.3.rs-5485840/v1), 2025-04-17
Supplement: Supplementary file 1 [file eb619b078fccd313b8fc7528.docx]

**Arabic version of the dizziness handicap inventory questionnaire ...**

**مؤشر الإعاقة من الدوران**

| **الاستفسارات** | **نعم** | **بعض الأحيان** | **لا** |
| --- | --- | --- | --- |

.1هل النظر إلى أعلى يزيد من مشكلتك؟

.2هل تشعر بالإحباط بسبب مشكلتك؟

.3هل تحدمن سفرك للعمل والترفيه بسبب هذه المشكلة؟

.4 هل المشي في ممرات الأسواق يزيد من مشكلتك؟

.5هل لديك صعوبة في الاستلقاء أو الاستيقاظ من على السرير بسبب مشكلتك؟

.6 هل تحد هذه المشكلة من مشاركتك بشكل كبير في الأنشطة الاجتماعية مثل: الخروج لتناول العشاء، والذهاب إلى قصور الافراح أو إلى الحفلات؟

.7هل لديك صعوبة في القراءة بسبب هذه المشكلة؟

.8هل القيام بالأنشطة العضلية مثل الرياضية وأداء الأعمال المنزلية مثل الكنس وجلي الصحون يزيد من مشكلتك؟

.9هل تخاف من مغادرة المنزل دون وجود أحد يرافقك بسبب مشكلتك؟

.10هل سبق أن أُحرجت أمام الآخرين بسبب مشكلتك؟

.11هل تحريك رأسك بسرعة يزيد من مشكلتك؟

.12هل تتجنب المرتفعات بسبب مشكلتك؟

.13هل التقلب على السرير يزيد مشكلتك؟

.14هل تواجه صعوبة في القيام بالأعمال الشاقة في المنزل أو الحديقة بسبب مشكلتك؟

.15هل تخشى بسبب مشكلتك أن يظن الناس بأنك تبدو مثل السكران؟

.16هل من الصعب المشي بمفردك بسبب مشكلتك؟

.17هل السير على الرصيف يزيد مشكلتك؟

.18هل من الصعب عليك أن تركز بسبب مشكلتك؟

.19هل من الصعب عليك المشي حول المنزل في الظلام بسبب مشكلتك؟

.20هل تشعر بالخوف من البقاء في البيت وحيداً بسبب مشكلتك؟

.21هل تشعر بأن مشكلتك تسبب لك نوع من الإعاقة؟

.22هل تسببت مشكلتك في توتر علاقاتك مع بقية أفراد عائلتك وأصدقائك؟

.23هل أنت مكتئب بسبب مشكلتك؟

.24هل تتعارض مشكلتك مع عملك أو مسؤولياتك المنزلية؟

.25 هل الركوع يزيد من مشكلتك؟

***The adapted Arabic version of HADS***

***مقياس المستشفى للقلق والاكتئاب***

نحن ندرك أن العواطف تلعب دورًا هامًا في معظم الأمراض. إذا كان طبيبك يعرف عن هذه المشاعر فإنه سوف يكون قادرًا على مساعدتك أكثر. تم تصميم هذا الاستبيان لمساعدتنا على معرفة ما تشعر به. اقرأ كل بند وارسم خط تحت الرد الأقرب إلى ما كنت تشعر في الأسبوع الماضي لا تستغرق وقتًا طويلًا على ردودك؛ فإن رد فعلك الفوري على كل بند سيكون على الأرجح أكثر دقة من إجابة طويلة مدروسة.

**.1 أشعر بالضغط أو التوتر الشديد:**

1. أغلب الوقت
2. كثيرًا من الوقت
3. من وقت لآخر
4. لا أشعر بهذا على الإطلاق

**.2لا زلت أتمتع بالأشياء التي كنت أتمتع بها:**

1. كثيرًا
2. ليس كثيرًا جدًا
3. فقط قليلًا
4. نادرًا

**.3أشعر بمشاعر مخيفة كأن شيئًا سيئًا سوف يحدث:**

1. بالتأكيد وسيء جدًا
2. نعم، ولكن ليس سيئًا جدًا
3. قليلًا، ولكن لا تقلقني
4. لا أشعر بهذا على الإطلاق

**.4أستطيع أن أضحك وأرى الجانب المضحك من الأشياء:**

1. مثلما كنت دائمًا
2. ليس كثيرًا جدًا الآن
3. بالتأكيد ليس كثيرًا الآن
4. لا أستطيع على الإطلاق

**.5 أفكر في أفكار مقلقة:**

1. كثيرًا جدًا من الوقت
2. كثيرًا من الوقت
3. من وقت لآخر، لكن ليس كثيرًا من الأحيان
4. فقط من وقت لآخر

**.6 أشعر بالبهجة:**

1. لا أشعر بهذا على الإطلاق
2. ليس كثيرًا
3. أحيانًا
4. معظم الوقت

**.7 أستطيع الجلوس بهدوء وأشعر بالراحة:**

1. بالتأكيد
2. عادة
3. ليس كثيرًا
4. لا أستطيع على الإطلاق

**.8 أشعر كأنني كسلان:**

1. تقريبًا كل الوقت
2. كثيرًا جدًا
3. أحيانًا
4. لا أشعر بهذا على الإطلاق

**.9أشعر بنوع من الخوف (اضطرابات في معدتي):**

1. لا أشعر بهذا على الإطلاق
2. من حين لآخر
3. كثيرًا إلى حد ما
4. كثيرًا جدًا

**.10 لم أعد أهتم بمظهري:**

1. بالتأكيد
2. لا أهتم كما ينبغي
3. اهتم قليلًا
4. أهتم مثل السابق

**.11 أشعر بعدم الارتياح كأنني أتحرك:**

1. كثيرًا جدًا في الواقع
2. كثيرًا نوعًا ما
3. ليس كثيرًا جدًا
4. لا أشعر بهذا على الإطلاق

**.12 أنظر إلى الأشياء باستمتاع:**

1. مثل ما اعتدت عليه
2. إلى حد ما أقل مما اعتدت عليه
3. بالتأكيد أقل مما اعتدت عليه
4. نادرًا

**.13 أشعر فجأة بالرعب:**

1. في الواقع كثيرًا جدًا
2. كثيرًا إلى حد ما
3. ليس كثيرًا
4. لا أشعر بهذا على الإطلاق

**.14 أستطيع التمتع بكتاب جيد أو الراديو أو برنامج تليفزيوني:**

1. كثيرًا
2. أحيانًا
3. ليس كثيرًا
4. نادرًا جدًا

**الاسم: ..........................................................**

**السن: ..........................................................**
